# Supplementary material for: Evaluating the Impact of Outpatient Multi-Dose Medication Packaging Service (MDMPS) on Medication Adherence and Clinical Outcomes
Source: PubMed Central journal article supplement — J Prim Care Community Health. 2020 Oct 22;11:2150132720965085. doi: 10.1177/2150132720965085 (PMC7585883; doi:10.1177/2150132720965085), 2020-10-22
Supplement: Appendices_MDMPS.pdf [file Appendices_MDMPS.pdf]

## Appendix 1

MDMPS sachets showing the timing and various administration instructions

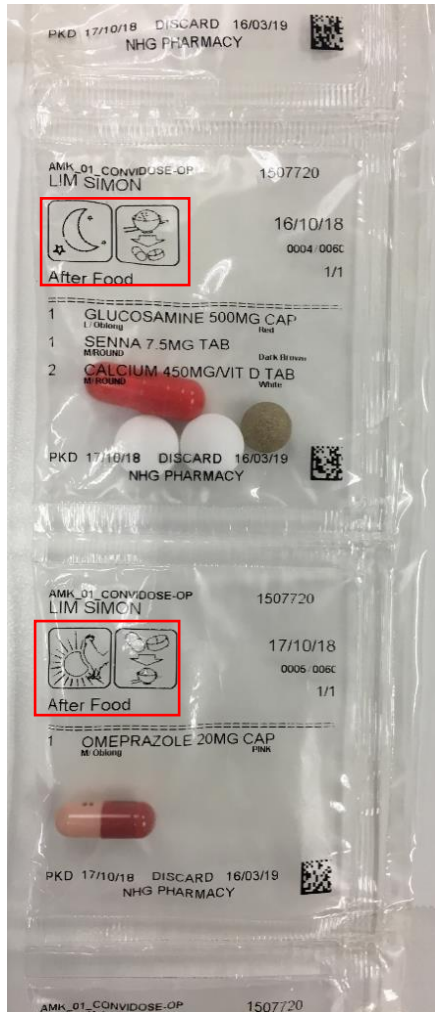

## Appendix 2

Information of the MDMPS sachets provided to all patients. This is used to inform patients how to use the sachets and the information of the pictures of the sachets.



**Convi Dose**<sup>TM</sup>  
Safer, Easier Medicines

### 3 Simple Steps to use ConviDose<sup>TM</sup> Sachets:



**Step 1:**  
Check the following instructions before taking

- 1 Date
- 2 Time of administration
- 3 If there are more than one sachet for the specific dosing time

**Step 2:**  
Tear off the sachet along the perforation



**Step 3:**  
Open the sachet by tearing from the top



### What do the pictures on the sachet mean?

The pictures on the sachet provide explanation on the timing and administration of your medications.

|                                                                                    |                                                                                    |                                                                                    |                                                                                    |                                                                                     |                                                                                      |                                                                                      |
|------------------------------------------------------------------------------------|------------------------------------------------------------------------------------|------------------------------------------------------------------------------------|------------------------------------------------------------------------------------|-------------------------------------------------------------------------------------|--------------------------------------------------------------------------------------|--------------------------------------------------------------------------------------|
|  |  |  |  |  |  |  |
| Morning<br>早上<br>Pagi<br>காலை                                                      | Moon<br>中午<br>Tengahari<br>நண்பகல்                                                 | Evening<br>傍晚<br>Petang<br>மாலை                                                    | Night<br>晚上<br>Malam<br>இரவு                                                       | Before meals<br>饭前<br>Sebelum makan<br>உணவுக்கு முன்பு                              | After meals<br>饭后<br>Selepas makan<br>உணவுக்கு பின்பு                                | Do not crush<br>不可压碎<br>Jangan Hancurkan<br>நசுக்க வேண்டாம்                          |

PLEASE KEEP YOUR CONVIDOSE<sup>TM</sup> SACHETS IN A COOL, DRY PLACE AWAY FROM DIRECT SUNLIGHT.  
DO NOT OPEN VACUUM-SEALED PACK TILL READY FOR CONSUMPTION.

For further enquiries, please contact our staff at 6385 4595 between 8.30am-5pm, Monday to Friday (except Public Holidays and eves of Public Holidays)

### **Appendix 3**

Questionnaire Sections included in study

| Section 1: Product Presentation, Effectiveness and Safety                                                                          |                                                                        |                          |                          |                          |                          |                          |
|------------------------------------------------------------------------------------------------------------------------------------|------------------------------------------------------------------------|--------------------------|--------------------------|--------------------------|--------------------------|--------------------------|
| Please rate the following questions: (1) Strongly Disagree (2) Somewhat Disagree (3) Neutral (4) Somewhat Agree (5) Strongly Agree |                                                                        |                          |                          |                          |                          |                          |
| Category                                                                                                                           | Description                                                            | 1                        | 2                        | 3                        | 4                        | 5                        |
| Effectiveness                                                                                                                      | ConviDose™ helps me to save time in managing my medicines.             | <input type="checkbox"/> |
| Safety                                                                                                                             | I trust that the correct medicines with the right quantity are packed. | <input type="checkbox"/> |

| Section 2: General Satisfaction & Recommendation                                                                                   |                          |                          |                          |                          |                          |
|------------------------------------------------------------------------------------------------------------------------------------|--------------------------|--------------------------|--------------------------|--------------------------|--------------------------|
| Please rate the following questions: (1) Strongly Disagree (2) Somewhat Disagree (3) Neutral (4) Somewhat Agree (5) Strongly Agree |                          |                          |                          |                          |                          |
| Description                                                                                                                        | 1                        | 2                        | 3                        | 4                        | 5                        |
| I am satisfied with the staff service.                                                                                             | <input type="checkbox"/> |
| I am satisfied with ConviDose™.                                                                                                    | <input type="checkbox"/> |
| I am likely and willing to continue the ConviDose™.                                                                                | <input type="checkbox"/> |
| I am willing to recommend the product and service to others.                                                                       | <input type="checkbox"/> |
